# Supplementary material for: Impact of Sprinting and Dribbling on Shoulder Joint and Pushrim Kinetics in Wheelchair Basketball Athletes
Source: Frontiers journal article supplement (doi:10.3389/fresc.2022.863093), 2022-06-02
Supplement: Image_1.PDF [file Image_1.PDF]

### Speed, peak pushrim kinetics and peak shoulder kinetics per participant

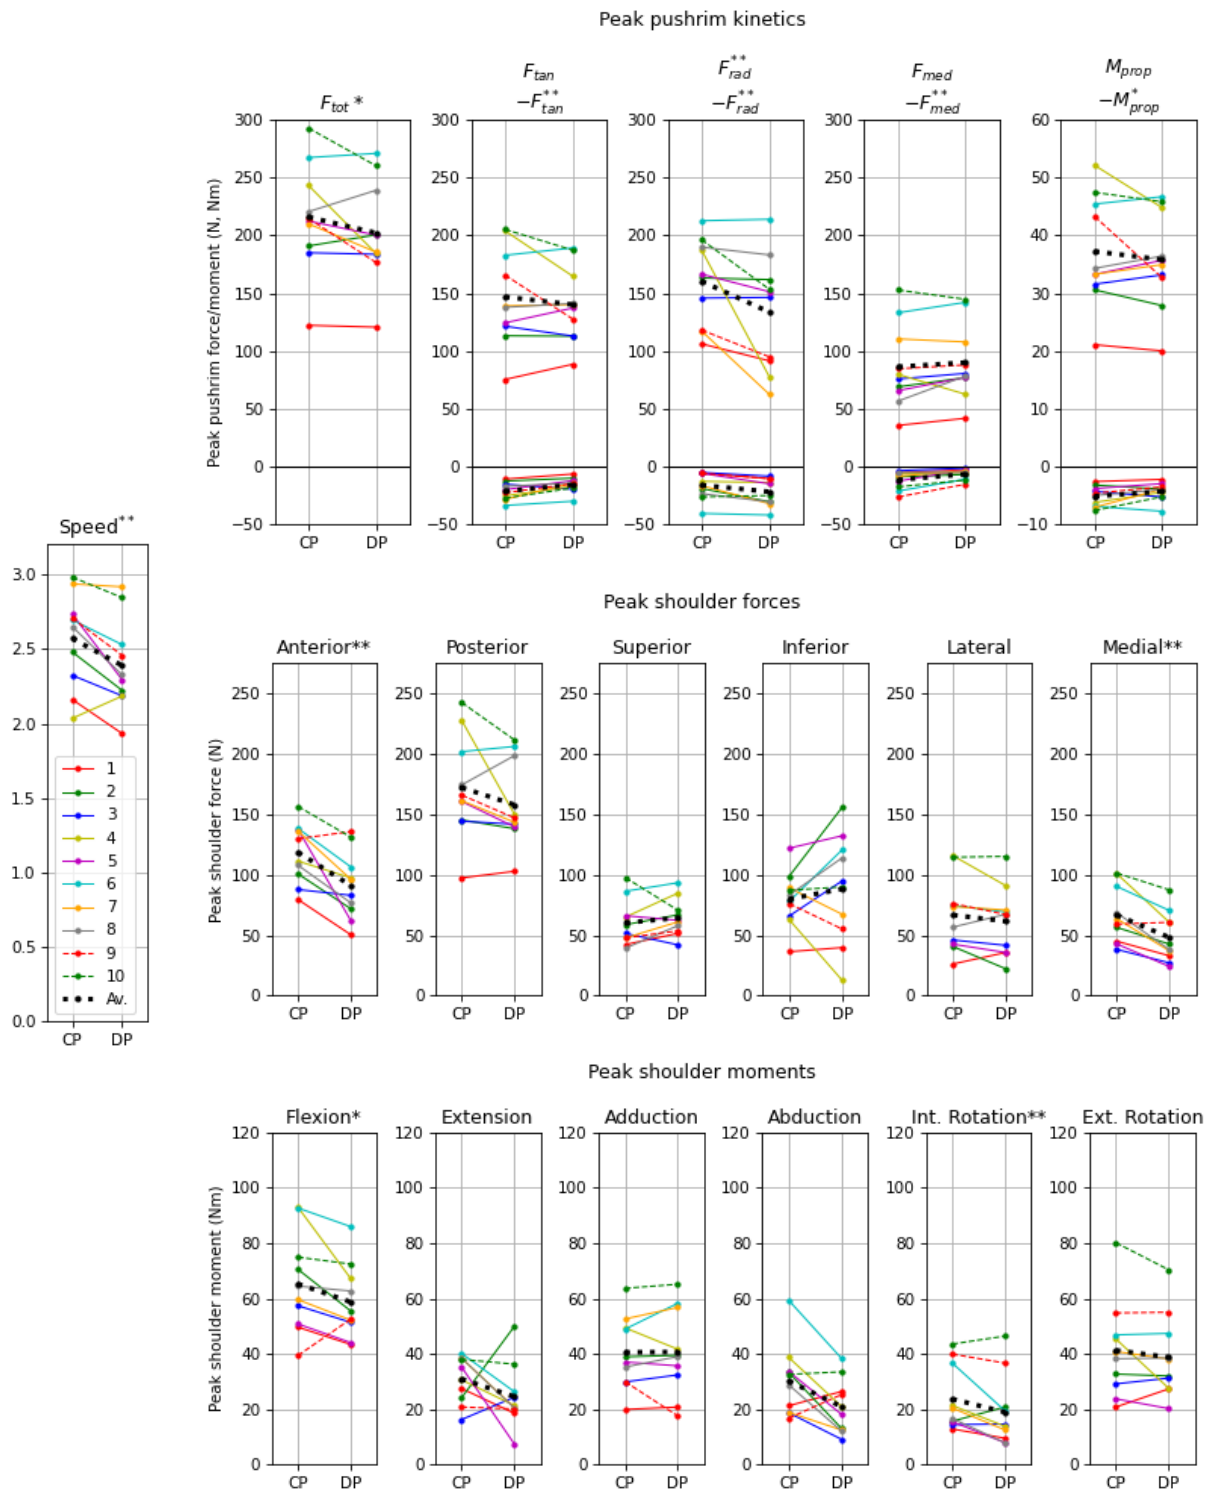

Moderate (\*) and large (\*\*) effect sizes are marked with asterisks.
